# Supplementary material for: Oxamate Attenuates Glycolysis and ER Stress in Silicotic Mice
Source: Int J Mol Sci. 2022 Mar 10;23(6):3013. doi: 10.3390/ijms23063013 (PMC8953611; doi:10.3390/ijms23063013)
Supplement: Supplementary file 1 [file ijms-23-03013-s001.zip › ijms-1602744-supplementary.pdf]

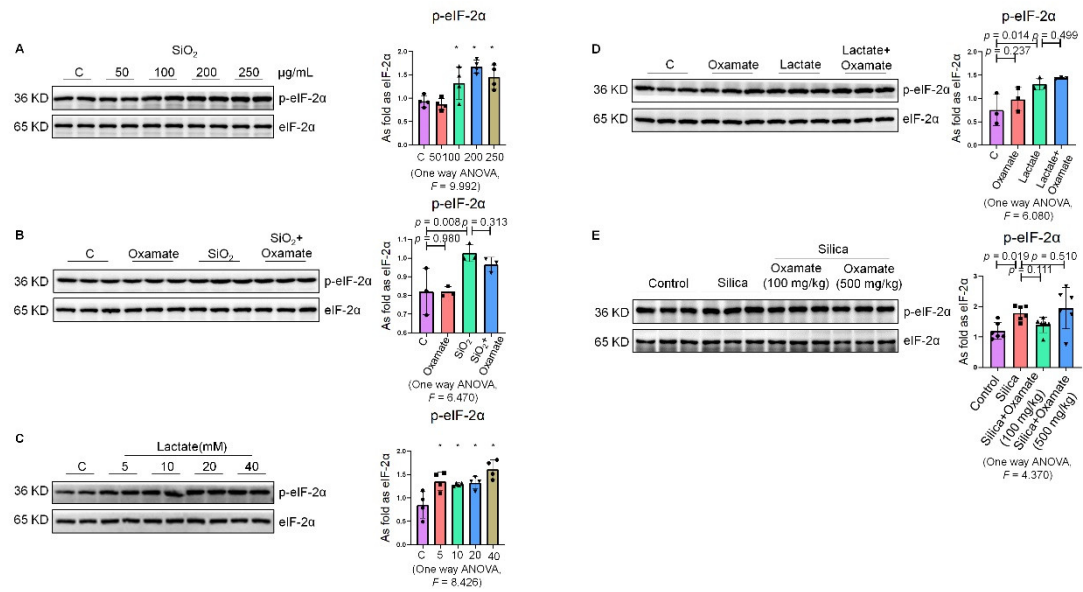

**Figure S1.** (A) Expression levels of p-eIF-2α in NR8383 cells treated with SiO<sub>2</sub> at different doses measured by Western blotting. \*Compared with control group,  $p < 0.05$ . Data are presented as the mean  $\pm$  SD,  $n = 4$  per group. (B) Protein expression of p-eIF-2α in NR8383 cells treated with oxamate, SiO<sub>2</sub>, and SiO<sub>2</sub> plus oxamate measured by Western blotting. Data are presented as the mean  $\pm$  SD,  $n = 3$  per group. (C) Expression levels of p-eIF-2α in NR8383 cells treated with lactate at different doses measured by Western blotting. \*Compared with control group,  $p < 0.05$ . Data are presented as the mean  $\pm$  SD,  $n = 4$  per group. (D) Protein expression of p-eIF-2α in NR8383 cells treated with oxamate, lactate, and lactate plus oxamate measured by Western blotting. Data are presented as the mean  $\pm$  SD,  $n = 3$  per group. (E) Expression levels of p-eIF-2α in mice lungs measured by Western blotting. Data are presented as the mean  $\pm$  SD,  $n = 6$  per group.
